# Supplementary material for: Determining Ancestry Proportions in Complex Admixture Scenarios in South Africa Using a Novel Proxy Ancestry Selection Method
Source: PubMed Central journal article supplement (PMC3774743; doi:10.1371/journal.pone.0073971), 2013-09-16
Supplement: pone.0073971.s012.pdf [file pone.0073971.s012.pdf]

**Table S1. Putative ancestral populations included in the fine characterization of the South African Coloureds (SAC) and simulation data.**

| Pop. Label                               | Source  | Pop Location                                   | Individuals |
|------------------------------------------|---------|------------------------------------------------|-------------|
| Admixed South African Coloured           |         |                                                |             |
| sac                                      | [1]     | South Africa Coloured population               | 764         |
| African: non Click-speaker               |         |                                                |             |
| moz                                      | HGDP    | Mozabite, Algeria                              | 9           |
| yor                                      | HGDP    | Yoruba in Ibadan Nigeria                       | 21          |
| man                                      | HGDP    | Mandenka, Senegal                              | 24          |
| bpg                                      | HGDP    | Biaka Pygmy Central Africa                     | 21          |
| mpg                                      | HGDP    | Mbuti Pygmy Congo                              | 12          |
| Kaba                                     | HGDP    | North of the Central African                   | 17          |
| Fang                                     | HGDP    | Equatorial Bantu                               | 15          |
| Fulani                                   | HGDP    | West central Africa                            | 2           |
| Bulala                                   | HGDP    | Central Chad                                   | 12          |
| Mada                                     | HGDP    | Cameroon                                       | 12          |
| Mausa                                    | HGDP    | West Africa Niger and Nigeria                  | 12          |
| Bamoun                                   | HGDP    | Cameroon                                       | 18          |
| Kongo                                    | HGDP    | Atlantic coast of Congo                        | 9           |
| Brong                                    | HGDP    | Ghana                                          | 8           |
| LWK                                      | HapMap3 | Luhya in Webuye, Kenya                         | 104         |
| MKK                                      | HapMap3 | Maasai in Kinyawe, Kenya                       | 108         |
| YRI                                      | HapMap3 | Yoruba in Ibadan, Nigeria                      | 147         |
| Igbo                                     | [2]     | Southeastern Nigeria                           | 15          |
| man                                      | HapMaP3 | Mandenka from Africa                           | 22          |
| African: Local South African Populations |         |                                                |             |
| SAN                                      | HGDP    | Ju 'hoan, Namibia                              | 5           |
| KHS                                      | [3]     | North and South Ju 'hoan, Namibia and Botswana | 25          |
| KHO                                      | [2]     | ǀKhomani, South Africa                         | 8           |
| SBAN                                     | [4]     | Bantu-South-Africa                             | 17          |
| STS                                      | [3, 4]  | Tswana Southern Africa                         | 16          |
| XHS                                      | [5]     | Xhosa, South-Africa                            | 20          |
| XHS2                                     | HGDP    | Xhosa, South-Africa                            | 5           |
| HER                                      | [4]     | Herero, South Africa and Namibia               | 14          |
| HAZ                                      | [6]     | Hadza, Tanzania                                | 17          |
| BUS                                      | [6]     | Bushmen, South Africa                          | 16          |
| SAW                                      | [6]     | Sandawe, Tanzania                              | 16          |
| African: Afroasiatic                     |         |                                                |             |
| ALG                                      | [6]     | Algeria                                        | 19          |

Continued on next page

Table 1 – continued from previous page

| Pop. Label | Source       | Pop Location                | Individuals |
|------------|--------------|-----------------------------|-------------|
| MRC_N      | [6]          | North Morocco               | 18          |
| LBY        | [6]          | Libya                       | 17          |
| MRC_S      | [6]          | South Morocco               | 16          |
| moz        | [6] and HGDP | Mozabite                    | 29          |
| EGT        | [6]          | Egypt                       | 19          |
| SAH_occ    | [6]          | Sahara Occidental           | 18          |
| TNS        | [6]          | Berber from Tunisia         | 18          |
| European   |              |                             |             |
| bas        | HGDP         | Basque, France              | 24          |
| sar        | HGDP         | Sardinian, Italy            | 27          |
| ita        | HGDP         | Italian, Italy-Bergamo      | 13          |
| orc        | HGDP         | Orkney, Islands             | 14          |
| fre        | HGDP         | French, France              | 29          |
| ady        | HGDP         | Adygei, Russia-Caucasus     | 15          |
| rus        | HGDP         | Russian, Russia             | 24          |
| TSI        | HapMap3      | Toscani in Italia           | 100         |
| CEU        | HapMap3      | Northern European           | 112         |
| East Asia  |              |                             |             |
| mia        | HGDP         | Miao-China                  | 10          |
| jap        | HGDP         | Japanese, Japan             | 28          |
| nax        | HGDP         | Naxi, China                 | 9           |
| dai        | HGDP         | Dai, China                  | 10          |
| yi         | HGDP         | Yi, China                   | 10          |
| tuj        | HGDP         | Tujia, China                | 10          |
| she        | HGDP         | She, China                  | 10          |
| lah        | HGDP         | Lahu, China                 | 7           |
| oro        | HGDP         | Oroqen, China               | 10          |
| uyg        | HGDP         | Uygur, China                | 9           |
| hez        | HGDP         | Hezhen, China               | 9           |
| dau        | HGDP         | Daur, China                 | 9           |
| xib        | HGDP         | Xibo, China                 | 9           |
| tuu        | HGDP         | Tu, China                   | 10          |
| mon        | HGDP         | Mongola, China              | 10          |
| cam        | HGDP         | Cambodian, Cambodia         | 11          |
| CHB        | HapMap3      | Han, Chinese in Beijing     | 137         |
| CHD        | HapMap3      | Chinese in Denver, Colorado | 109         |
| JPT        | HapMap3      | Japanese in Tokyo           | 113         |
| South Asia |              |                             |             |

Continued on next page

Table 1 – continued from previous page

| Pop. Label  | Source  | Pop Location                | Individuals |
|-------------|---------|-----------------------------|-------------|
| han         | HGDP    | Han, Chinese                | 43          |
| bra         | HGDP    | Brahui, Pakistan            | 23          |
| bal         | HGDP    | Balochi, Pakistan           | 23          |
| mak         | HGDP    | Makrani, Pakistan           | 22          |
| kal         | HGDP    | Kalash, Pakistan            | 25          |
| pat         | HGDP    | Pathan, Pakistan            | 23          |
| sin         | HGDP    | Sindhi, Pakistan            | 25          |
| bur         | HGDP    | Burusho, Pakistan           | 23          |
| haz         | HGDP    | Hazara, Pakistan            | 22          |
| GIH         | HapMap3 | Gujarati Indians in Texas   | 93          |
| Middle East |         |                             |             |
| bed         | HGDP    | Bedouin, Israel-Negev       | 35          |
| dru         | HGDP    | Druze, Israel-Carmel        | 26          |
| yak         | HGDP    | Yakut, Siberia              | 19          |
| qatari      | [2]     | Qatar                       | 22          |
| pal         | HGDP    | Palestinian, Israel-Central | 40          |

## References

1. deWit E, Delpont W, Chimusa R, Meintjes A, Moller M, et al. (2010) Genome-wide analysis of the structure of the south African Coloured population in the western Cape. *Hum Genet* 128, 15-53 .
2. Henn B, Botigue L, Gravel S, Wang W, Brisbin A, et al. (2012) Genomic ancestry of north Africans supports back-to-Africa migrations. *Nat Comm* 3 (1143) 2140 .
3. Pickrell K, Patterson N, Barbieri C, Berthold F, Gerlach L, et al. (2012) The genetic prehistory of southern Africa. *Nature Communications* 3 (1143) doi:101038/ncomms2140 .
4. Schlebusch C, Skoglund P, Sjodin P, Gattepaille L, Hernandez D, et al. (2012) Genomic variation in seven Khoe-San groups reveals adaptation and complex African history. *Science* 338, 374-379 .
5. Chimusa E, Meintjes A, Tchanga M, Mulder N, Soodyall H, et al. (2013) Genome-wide haplotype and signature of selection in indigenous southern African populations. (Preparation) .
6. Henn B, Gignoux C, Jobinc M, Grankae J, Macphersonf, et al. (2011) Hunter-gatherer genomic diversity suggests a southern African origin for modern humans. *PNAS* 108, 5154-5162 .
