# Supplementary material for: Determining Ancestry Proportions in Complex Admixture Scenarios in South Africa Using a Novel Proxy Ancestry Selection Method
Source: PubMed Central journal article supplement (PMC3774743; doi:10.1371/journal.pone.0073971), 2013-09-16
Supplement: pone.0073971.s013.pdf [file pone.0073971.s013.pdf]

**Table S2. f3 Statistic: the signal of admixture in the simulation data (simulation obtained from 5-way admixture of †Khomani, IsiXhosa, Chinese (CHD) and Indian Gujarati and CEU) using pair-wise ancestral populations.** The f3 statistic fails to provide clear evidence/non-evidence of population admixture based on simulated data of a 5-way admixed population.

| Pop 1    | Pop 2    | Target         | f3        | Standard Error | Z       |
|----------|----------|----------------|-----------|----------------|---------|
| CEU      | SAN      | Simulated data | -0.008274 | 0.001486       | -5.567  |
| CEU      | CHD      | Simulated      | 0.013206  | 0.000848       | 15.577  |
| CEU      | Dai      | Simulated data | -0.007101 | 0.001613       | -4.402  |
| CEU      | Daur     | Simulated data | -0.00588  | 0.001473       | -3.993  |
| CEU      | Druze    | Simulated data | -0.004476 | 0.001406       | -3.183  |
| CEU      | French   | Simulated data | -0.004281 | 0.001307       | -3.275  |
| CEU      | Gujarati | Simulated data | 0.024759  | 0.00079        | 31.328  |
| CEU      | Herere   | Simulated data | -0.005859 | 0.001402       | -4.178  |
| CEU      | IsiXhosa | Simulated data | -0.017475 | 0.000485       | -36.003 |
| CEU      | Italian  | Simulated data | -0.005691 | 0.001307       | -4.355  |
| CEU      | Japanese | Simulated data | -0.005363 | 0.001526       | -3.515  |
| CEU      | Ju 'huan | Simulated data | -0.00929  | 0.00154        | -6.034  |
| CEU      | Kongo    | Simulated data | -0.005008 | 0.001272       | -3.937  |
| CEU      | Bushmen  | Simulated data | -0.007629 | 0.001445       | -5.281  |
| CEU      | †Khomani | Simulated data | -0.016297 | 0.000507       | -32.134 |
| CEU      | Pathan   | Simulated data | -0.006022 | 0.001559       | -3.862  |
| CEU      | Russian  | Simulated data | -0.004508 | 0.001369       | -3.292  |
| CHD      | SAN      | Simulated data | -0.002889 | 0.002075       | -1.392  |
| CHD      | Dai      | Simulated data | -0.00351  | 0.0016         | -2.194  |
| CHD      | Daur     | Simulated data | -0.003448 | 0.001628       | -2.118  |
| CHD      | Druze    | Simulated data | -0.001977 | 0.00165        | -1.198  |
| CHD      | French   | Simulated data | -0.000712 | 0.001629       | -0.437  |
| CHD      | Gujarati | Simulated data | 0.021482  | 0.000792       | 27.115  |
| CHD      | Herere   | Simulated data | -0.00043  | 0.001972       | -0.218  |
| CHD      | IsiXhosa | Simulated data | -0.013885 | 0.000574       | -24.189 |
| CHD      | Italian  | Simulated data | -0.001775 | 0.001663       | -1.067  |
| CHD      | Japanese | Simulated data | -0.003516 | 0.001573       | -2.235  |
| CHD      | Ju 'huan | Simulated data | -0.004513 | 0.002272       | -1.986  |
| CHD      | Kongo    | Simulated data | -0.002003 | 0.001721       | -1.161  |
| CHD      | Bushmen  | Simulated data | -0.003558 | 0.001973       | -1.803  |
| CHD      | †Khomani | Simulated data | -0.011325 | 0.00058        | -19.529 |
| CHD      | Pathan   | Simulated data | -0.003077 | 0.001628       | -1.889  |
| CHD      | Russian  | Simulated data | -0.00111  | 0.001669       | -0.665  |
| Gujarati | IsiXhosa | Simulated data | -0.015372 | 0.00049        | -31.344 |
| Gujarati | †Khomani | Simulated data | -0.014524 | 0.000514       | -28.270 |
| IsiXhosa | SAN      | Simulated data | 0.012951  | 0.00108        | 11.988  |
| IsiXhosa | Dai      | Simulated data | 0.012467  | 0.001004       | 12.414  |
| IsiXhosa | Daur     | Simulated data | 0.01169   | 0.001094       | 10.689  |
| IsiXhosa | Druze    | Simulated data | 0.011085  | 0.000988       | 11.214  |
| IsiXhosa | French   | Simulated data | 0.010815  | 0.00096        | 11.261  |
| IsiXhosa | Herere   | Simulated data | 0.011161  | 0.000816       | 13.675  |
| IsiXhosa | Italian  | Simulated data | 0.011392  | 0.000969       | 11.757  |
| IsiXhosa | Japanese | Simulated data | 0.011498  | 0.001059       | 10.857  |
| IsiXhosa | Ju 'huan | Simulated data | 0.013441  | 0.001109       | 12.12   |
| IsiXhosa | Kongo    | Simulated data | 0.011467  | 0.000935       | 12.261  |
| IsiXhosa | Bushmen  | Simulated data | 0.012622  | 0.001064       | 11.859  |
| IsiXhosa | Pathan   | Simulated data | 0.011657  | 0.000999       | 11.672  |
| IsiXhosa | Russian  | Simulated data | 0.010773  | 0.000995       | 10.83   |
| †Khomani | SAN      | Simulated data | 0.001143  | 0.001169       | 0.978   |
| †Khomani | Dai      | Simulated data | 0.00037   | 0.001085       | 0.341   |
| †Khomani | Daur     | Simulated data | 0.000218  | 0.001041       | 0.209   |
| †Khomani | Druze    | Simulated data | -0.001391 | 0.001057       | -1.315  |
| †Khomani | French   | Simulated data | -0.001505 | 0.000977       | -1.54   |
| †Khomani | Herere   | Simulated data | -0.000838 | 0.001046       | -0.801  |
| †Khomani | IsiXhosa | Simulated data | 0.002469  | 0.000364       | 6.79    |
| †Khomani | Italian  | Simulated data | -0.00128  | 0.001029       | -1.243  |
| †Khomani | Japanese | Simulated data | -0.000415 | 0.001039       | -0.399  |
| †Khomani | Ju 'huan | Simulated data | 0.002027  | 0.00121        | 1.675   |
| †Khomani | Kongo    | Simulated data | -0.000756 | 0.000957       | -0.79   |
| †Khomani | Bushmen  | Simulated data | 0.000484  | 0.001189       | 0.407   |
| †Khomani | Pathan   | Simulated data | -0.000232 | 0.001071       | -0.217  |
| †Khomani | Russian  | Simulated data | -0.00108  | 0.000986       | -1.095  |
