# Supplementary material for: Determining Ancestry Proportions in Complex Admixture Scenarios in South Africa Using a Novel Proxy Ancestry Selection Method
Source: PubMed Central journal article supplement (PMC3774743; doi:10.1371/journal.pone.0073971), 2013-09-16
Supplement: pone.0073971.s014.pdf [file pone.0073971.s014.pdf]

**Table S3. Comparing genetic diversity between the South African Coloured population (SAC) and the five proxy ancestral groups contributing to the SAC admixture.** Mean and standard error of shared haplotype segment in cM (Hap. Segment), mean and standard error of haplotype diversity measure (Hap. diversity) and proportion of IBD (Prop. IBD).

|                 | <b>Hap. Segment</b> | <b>Hap. diversity</b> | <b>Prop. IBD</b> |
|-----------------|---------------------|-----------------------|------------------|
| <b>SAC</b>      | 1.022 ± 0.004       | 81.975 ± 0.002        | (0.0018)         |
| <b>isiXhosa</b> | 0.9058 ± 0.042      | 16.860 ± 0.003        | (0.0284)         |
| <b>‡Khomani</b> | 1.123 ± 0.033       | 5.214 ± 0.004         | (0.1714)         |
| <b>CEU</b>      | 1.192 ± 0.043       | 50.544 ± 0.003        | (0.0189)         |
| <b>CHD</b>      | 0.715 ± 0.0417      | 54.885 ± 0.003        | (0.1051)         |
| <b>Gujarati</b> | 0.614 ± 0.042       | 57.883 ± 0.003        | (0.0512)         |
