# Supplementary material for: Determining Ancestry Proportions in Complex Admixture Scenarios in South Africa Using a Novel Proxy Ancestry Selection Method
Source: PubMed Central journal article supplement (PMC3774743; doi:10.1371/journal.pone.0073971), 2013-09-16
Supplement: pone.0073971.s015.pdf [file pone.0073971.s015.pdf]

## PROXYANC: $F_{ST}$ -optimal Quadratic Cone Programming

To limit the effect of background linkage disequilibrium, we assume adjacent SNPs in each population that are spaced 10 Kb from each other. Let  $Z$  denote a set of pools of distinct reference ancestral populations. Suppose we have SNP  $j$ , let  $N_j$  and  $p_j$  be the total variant allele count and observed population allele-frequency in the admixed population ( $A$ ), and  $N_{jk}$  and  $p_{jk}$  be the total variant allele count and the population observed allele-frequency in reference population  $k = 1, 2, \dots, K$  of unrelated individuals. Given different combinations  $C$  of  $L = |Z|$  reference populations of unrelated individuals from each pool  $S_i \in Z = \mathbb{N}^L, (i = 1, \dots, L)$ , each combination  $C$  of  $L$  reference populations can be obtained from the Cartesian product  $T = \prod_{i=1}^L S_i, C \in Z$ . Thus, from each  $C \in Z$  we construct synthetic populations consisting of  $L$  populations as the following linear combination,

$$p_{j\alpha} = \sum_{k=1}^L \alpha_k p_{jk}, \quad (1)$$

where  $\alpha_l$  is the ancestral proportion. A particular combination of  $L$  populations (synthetic admixed population) consists of the best proxy ancestries of  $A$  if their linear combination (in equation 1) minimizes the constructed objective (in equation 2) function  $\tilde{F}_j \approx F_{ST}(A, p_{j\alpha})$ .  $\tilde{F}_j$  is approximated from a classical  $F_{ST}$  function in order to render the optimization problem convex. This problem is related to optimal quadratic cone programming, where the objective function  $\tilde{F}_j$  is given at each SNP  $j$  by,

$$\tilde{F}_j(\alpha) = \left[ (p_{j\alpha} - p_j)^2 - p_j \frac{(1 - p_j)}{N_j} - \sum_{l=1}^L \alpha_l^2 p_j \frac{(1 - p_j)}{N_{jl}} \right] \times \frac{1}{p_j(1 - p_j) \cdot L}, \quad (2)$$

subject to  $\sum_{l=1}^L \alpha_l = 1$  and

$$\alpha_l \leq 0, \forall l \in \{1, \dots, L\}.$$

Equation 2 is a generalization of the objective function described in [1], and is a quadratic convex function with respect to  $\alpha_l$  (ancestry proportion), therefore a global minimum can be found. To obtain a matrix representation of the optimal cone programming, equation 2 can be expanded. Let us denote  $C_1 = \frac{1}{p_j(1-p_j)K}$ ,  $C_2 = p_j(1-p_j)$ , and  $C_3 = p_j \frac{(1-p_j)}{N_j}$ . Thus, equation 2 becomes,

$$\tilde{F}_j(\alpha) = \left[ (p_{j\alpha} - p_j)^2 - C_3 - \sum_{l=1}^L \frac{\alpha_l^2}{N_{jl}} C_2 \right] \times C_1. \quad (3)$$

It follows that,

$$\tilde{F}_j(\alpha) = \left[ p_{j\alpha}^2 - 2p_{j\alpha}p_j + \underbrace{p_j^2 - C_3}_{C_4} - \sum_{l=1}^L \frac{\alpha_l^2}{N_{jl}} C_2 \right] \times C_1. \quad (4)$$

Substituting equation 1 into equation 4, we obtain,

$$\tilde{F}_j(\alpha) = \left[ \left( \sum_{l=1}^L \alpha_l p_{jk} \right)^2 - 2 \sum_{l=1}^L \alpha_l p_{jl} p_j + C_4 - \sum_{l=1}^L \frac{\alpha_l^2}{N_{jl}} C_2 \right] \times C_1. \quad (5)$$

Now expanding equation 5, using a squared finite sum,

$$\left( \sum_{l=0}^L x_l \right)^2 = \sum_{l=0}^L x_l^2 + \sum_{l \neq n} x_l x_n,$$

such that  $x$  is a variable, it follows that

$$\begin{aligned}\tilde{F}_j(\alpha) &= \left[ \sum_{l=1}^L \alpha_l^2 p_{jl}^2 + \sum_{l \neq n} (\alpha_l \alpha_n) p_{jl} p_{jn} - 2 \sum_{l=1}^L \alpha_l p_{jl} p_j + C_4 - \sum_{l=1}^L \frac{\alpha_l^2}{N_{jl}} C_2 \right] \times C_1 \\ &= \left[ \sum_{k=1}^L \alpha_l^2 (p_{jl}^2 - \frac{C_2}{N_{jl}}) + \sum_{l \neq n} (\alpha_l \alpha_n) p_{jl} p_{jn} - 2 \sum_{l=1}^L \alpha_l p_{jl} p_j + C_4 \right] \times C_1.\end{aligned}\quad (6)$$

Knowing that the ancestral proportion must sum to 1,  $\sum_{l=1}^L \alpha_l = 1$  then

$$\sum_{l=1}^L \alpha_l C_4 = C_4,$$

and equation 6 becomes,

$$\begin{aligned}\tilde{F}_j(\alpha) &= \left[ \sum_{l=1}^L \alpha_l^2 (p_{jl}^2 - \frac{C_2}{N_{jl}}) C_1 \right] + \left[ \sum_{l \neq n} (\alpha_l \alpha_n) p_{jl} p_{jn} C_1 \right] - 2 \sum_{l=1}^L \alpha_l p_{jl} p_j C_1 + \sum_{l=1}^L \alpha_l C_4 C_1 \\ &= \left[ \sum_{l=1}^L \alpha_l^2 (p_{jl}^2 - \frac{C_2}{N_{jl}}) C_1 \right] + \left[ \sum_{l \neq n} (\alpha_l \alpha_n) p_{jl} p_{jn} C_1 \right] + \left[ \sum_{l=1}^L \alpha_l (C_4 - 2p_{jl} p_j) C_1 \right].\end{aligned}\quad (7)$$

Therefore, the matrix representation of the optimal Cone Programming can be obtained as follows,

$$\min_{\alpha} = \left( \frac{1}{2} \alpha^T P \alpha + q^T \alpha \right) \text{ subject to } -\alpha G \leq 0 \text{ and } \alpha A = 1, \quad (8)$$

where  $\alpha$  is a vector of L-dimensions of unknown ancestry proportions,  $G$  is an identity vector of L-dimensions,  $A$  is a vector of allele frequencies of L-dimensions,  $P$  is a positive semi definite matrix, and its diagonal elements are all coefficients of  $\alpha^2$ :

$$(\alpha^2)_l = 2 \frac{p_{jl}^2 - \frac{p_j(1-p_j)}{N_{jl}}}{p_j(1-p_j)L}, \quad (9)$$

and the mixture coefficients  $\alpha_l \alpha_n$  consist of its symmetric elements, and are given by:

$$(\alpha)_{ln} = 2 \frac{p_{jl} p_{jn}}{p_j(1-p_j)L}, \quad \text{for } k \neq n, \quad (10)$$

and the linear coefficients  $\alpha_l$  are the elements of vector  $q$  in equation 8, and are represented by:

$$(\alpha)_l = \frac{(p_j^2 - p_j \frac{(1-p_j)}{N_j} - 2p_{jl} p_j)}{p_j(1-p_j)L}. \quad (11)$$

For the optimization of equations (3) or (2) with respect to  $\alpha_l$  (ancestry proportions,  $l = 1, \dots, L$ ), the matrix form in equation (3) is constructed by summing equations (2), (4), (5) and (6) independently across all SNPs.

## References

1. Price A, Helgason A, Palsson S, Stefansson H, Clair D, et al. (2009) The impact of divergence time on the nature of population structure: An example from Iceland. *PLoS Genet* 5(6), e1000505 .
